# Supplementary material for: Two parallel pathways connect glutamine metabolism and mTORC1 activity to regulate glutamoptosis
Source: PubMed Central journal article supplement (PMC8355106; doi:10.1038/s41467-021-25079-4), 2021-08-10
Supplement: 41467_2021_25079_MOESM1_ESM.pdf [file 41467_2021_25079_MOESM1_ESM.pdf]

# Two parallel pathways connect glutamine metabolism and mTORC1 activity to regulate glutamoptosis

Clément Bodineau<sup>1,2</sup>, Mercedes Tomé<sup>1</sup>, Sarah Courtois<sup>3</sup>, Ana S.H. Costa<sup>4,5</sup>, Marco Sciacovelli<sup>4</sup>, Benoit Rousseau<sup>6</sup>, Elodie Richard<sup>7</sup>, Pierre Vacher<sup>7</sup>, Carlos Parejo-Pérez<sup>8</sup>, Emilie Bessedé<sup>3</sup>, Christine Varon<sup>3</sup>, Pierre Soubeyran<sup>7</sup>, Christian Frezza<sup>4</sup>, Piedad del Socorro Murdoch<sup>1,9</sup>, Victor H. Villar<sup>10</sup> and Raúl V. Durán<sup>1,2,7,11</sup>

<sup>1</sup> *Centro Andaluz de Biología Molecular y Medicina Regenerativa*, Consejo Superior de Investigaciones Científicas - Universidad de Sevilla - Universidad Pablo de Olavide, Avda. Américo Vespucio 24, 41092 Seville, Spain

<sup>2</sup> *Institut Européen de Chimie et Biologie*, INSERM U1218, Université de Bordeaux, 2 Rue Robert Escarpit, 33607 Pessac, France

<sup>3</sup> *Bordeaux Research in Translational Oncology*, INSERM U1053, Université de Bordeaux, 146 rue Léo Saignat, 33076 Bordeaux cedex, France

<sup>4</sup> *Medical Research Council Cancer Unit*, University of Cambridge, Hutchison/MR Research Centre, Box 197, Cambridge Biomedical Campus, Cambridge CB2 0XZ, UK

<sup>5</sup> Cold Spring Harbor Laboratory, Cold Spring Harbor NY 11724, USA

<sup>6</sup> *Service Commun des Animaleries, Animalerie A2*, University of Bordeaux, Bordeaux, France

<sup>7</sup> *Institut Bergonié*, INSERM U1218, 229 Cours de l'Argonne, 33076 Bordeaux, France

<sup>8</sup> *Instituto de Bioquímica Vegetal y Fotosíntesis*, Consejo Superior de Investigaciones Científicas - Universidad de Sevilla, Avda. Américo Vespucio 49. 41092 Seville, Spain.

<sup>9</sup> *Departamento de Bioquímica Vegetal y Biología Molecular*, Universidad de Sevilla, Avda. Reina Mercedes 6, C.P. 41012, Seville, Spain

<sup>10</sup> CRUK Beatson Institute, Glasgow G61 1BD, UK

<sup>11</sup> To whom correspondence should be addressed: Raúl V. Durán: [raul.duran@cabimer.es](mailto:raul.duran@cabimer.es)

## 1 **Keywords**

2 AMPK, ASNS, glutamine, glutamoptosis, mTORC1, GABA shunt, metabolism

### 3 Supplementary Methods

#### 4 Reagents

5 A list of the source of the reagents is shown in the Supplementary Table 1.

6

### 7 Supplementary Methods

8 **Supplementary Table 1.** Source and usage conditions of all the reagents used in this work.

| <b>REAGENT or RESSOURCE</b>                           | <b>PROVIDER</b> | <b>REFERENCE</b> | <b>DILUTION</b> |
|-------------------------------------------------------|-----------------|------------------|-----------------|
| <b>Antibodies</b>                                     |                 |                  |                 |
| rabbit anti-human Phospho-AMPK $\alpha$ (Thr172)      | Cell signal     | #2535            | 1:1000          |
| rabbit anti-human AMPK $\alpha$                       | Cell Signal     | #5832            | 1:1000          |
| rabbit anti-human Phospho-Raptor (S792)               | Cell Signal     | #2083            | 1:1000          |
| rabbit anti-human Raptor (24C12)                      | Cell Signal     | #2280            | 1:1000          |
| rabbit anti-human Phospho-p70 S6 Kinase (Thr389)      | Cell Signal     | #9234            | 1:1000          |
| rabbit anti-human p70 S6 Kinase                       | Cell Signal     | #2708            | 1:1000          |
| rabbit anti-human Phospho-S6 Ribosomal (Ser235/236)   | Cell Signal     | #4856            | 1:1000          |
| rabbit anti-human S6 Ribosomal Protein                | Cell Signal     | #2217            | 1:1000          |
| rabbit anti-human Phospho-4E-BP1 (Thr37/46)           | Cell Signal     | #2855            | 1:1000          |
| rabbit anti-human 4E-BP1                              | Cell Signal     | #9452            | 1:1000          |
| rabbit anti-human $\beta$ -Actin                      | Cell Signal     | #4967            | 1:1000          |
| rabbit anti-human Glutaminase                         | abcam           | ab93434          | 1:1000          |
| rabbit anti-human Glutamate Dehydrogenase 1/2         | Cell Signal     | #12793           | 1:1000          |
| rabbit anti-human ASNS                                | Bethyl          | A305-331A        | 1:1000          |
| rabbit anti-human Cleaved Caspase-3 (Asp175)          | Cell Signal     | #9664            | 1:1000          |
| rabbit anti-human Cleaved PARP (Asp214)               | Cell Signal     | #5625            | 1:1000          |
| mouse anti-human Myc-c-Myc                            | scbt            | sc-40            | 1:1000          |
| rabbit anti-HA-tag                                    | Sigma Aldrich   | SAB4300603       | 1:1000          |
| goat anti-rabbit HRP-linked                           | Cell Signal     | #7074            | 1:5000          |
| horse anti-mouse HRP- linked                          | Cell Signal     | #7076            | 1:5000          |
| mouse anti-CD63                                       | Sigma Aldrich   | Sab4700215       | 1:400           |
| rabbit anti-mTOR                                      | Cell Signal     | #2983            | 1:150           |
| mouse anti-lamp2                                      | abcam           | ab25631          | 1:400           |
| donkey anti-mouse secondary antibody, Alexa Fluor 555 | Thermo Fischer  | A31570           | 1:200           |

donkey anti-rabbit secondary antibody, Alexa Fluor 488 Thermo Fischer R37118 1:200

---

**Chemicals**

---

|              |                 |           |
|--------------|-----------------|-----------|
| BPTES        | Sigma Aldrich   | SML0601   |
| DON          | Sigma Aldrich   | D2141     |
| DMKG         | Sigma Aldrich   | 349631    |
| L-Glutamine  | Sigma Aldrich   | G8540     |
| L-Leucine    | Sigma Aldrich   | L8912     |
| AICAR        | Sigma Aldrich   | D150959   |
| Metformin    | Sigma Aldrich   | PHR1084   |
| A769662      | Santa Cruz Bio. | Sc-203790 |
| Temsirolimus | Sigma Aldrich   | PZ0020    |
| Oligomycin   | Sigma Aldrich   | R8875     |
| FCCP         | Sigma Aldrich   | C2920     |
| Rotenone     | Sigma Aldrich   | R8875     |
| Antimycin A  | Sigma Aldrich   | A8674     |

---

**siRNA**

---

|                                                                                                         |           |          |
|---------------------------------------------------------------------------------------------------------|-----------|----------|
| Control pool:<br>UGGUUUACAUGUCGACUAA<br>UGGUUUACAUGUUGUGUGA<br>UGGUUUACAUGUUUCUGA<br>UGGUUUACAUGUUUCCUA | Dharmacon | D-001810 |
| GLS1 pool:<br>CCUGAAGCAGUUCGAAAUA<br>CGUAAUAUGUGCAUCGAUA<br>AGAAAGUGGAGAUCGAAAU<br>GCACAGACAUGGUUGGUAU  | Dharmacon | L-004548 |
| GDH pool:<br>CCCAAGAACUAUACUGAUA<br>GCGAAGCGCUGUUGCUGUC<br>GAAGAUCUAUGGUUGACUA<br>CCCAUGAAGUGCUAGAUAA   | Dharmacon | L-004032 |
| ASNS pool:<br>GGGUAGAGAUACAUUAUGGA<br>UAUGUUGGAUGGUGUGUUU<br>GGUGAAAUCUACAACCAUA<br>GUAAAGAAACGUUUGAUGA | Dharmacon | L-009377 |

---

**Plasmids**

---

|                      |         |        |
|----------------------|---------|--------|
| pRK5-HA GST RagB wt  | Addgene | #19301 |
| pRK5-HA GST RagB 99L | Addgene | #19303 |
| pRK5-HA GST RagD wt  | Addgene | #19307 |
| pRK5-HA GST RagD 77L | Addgene | #19308 |

|                                           |                                      |                                             |
|-------------------------------------------|--------------------------------------|---------------------------------------------|
| pcDNA3-AMPKa2-CA                          | Benoit Viollet                       | Foretz <i>et al</i> 2005<br><i>Diabetes</i> |
| pcDNA3.1-HA                               | Addgene                              | #128034                                     |
| <b>qPCR primers</b>                       |                                      |                                             |
| ASNS:                                     |                                      | 224589113c1                                 |
| Fw: CAGCGGGGACCCAATAGTAG                  |                                      |                                             |
| Rv: GTGTAGGACGTGAGCAGAAAA                 |                                      |                                             |
| <b>Stables isotopes</b>                   |                                      |                                             |
| [U- <sup>13</sup> C]glutamine             | Cambridge<br>Isotope<br>Laboratories | CLM-1822-H-<br>MPT                          |
| [ <sup>15</sup> N <sub>2</sub> ]glutamine | Cambridge<br>Isotope<br>Laboratories | NLM-1328-PK                                 |

9

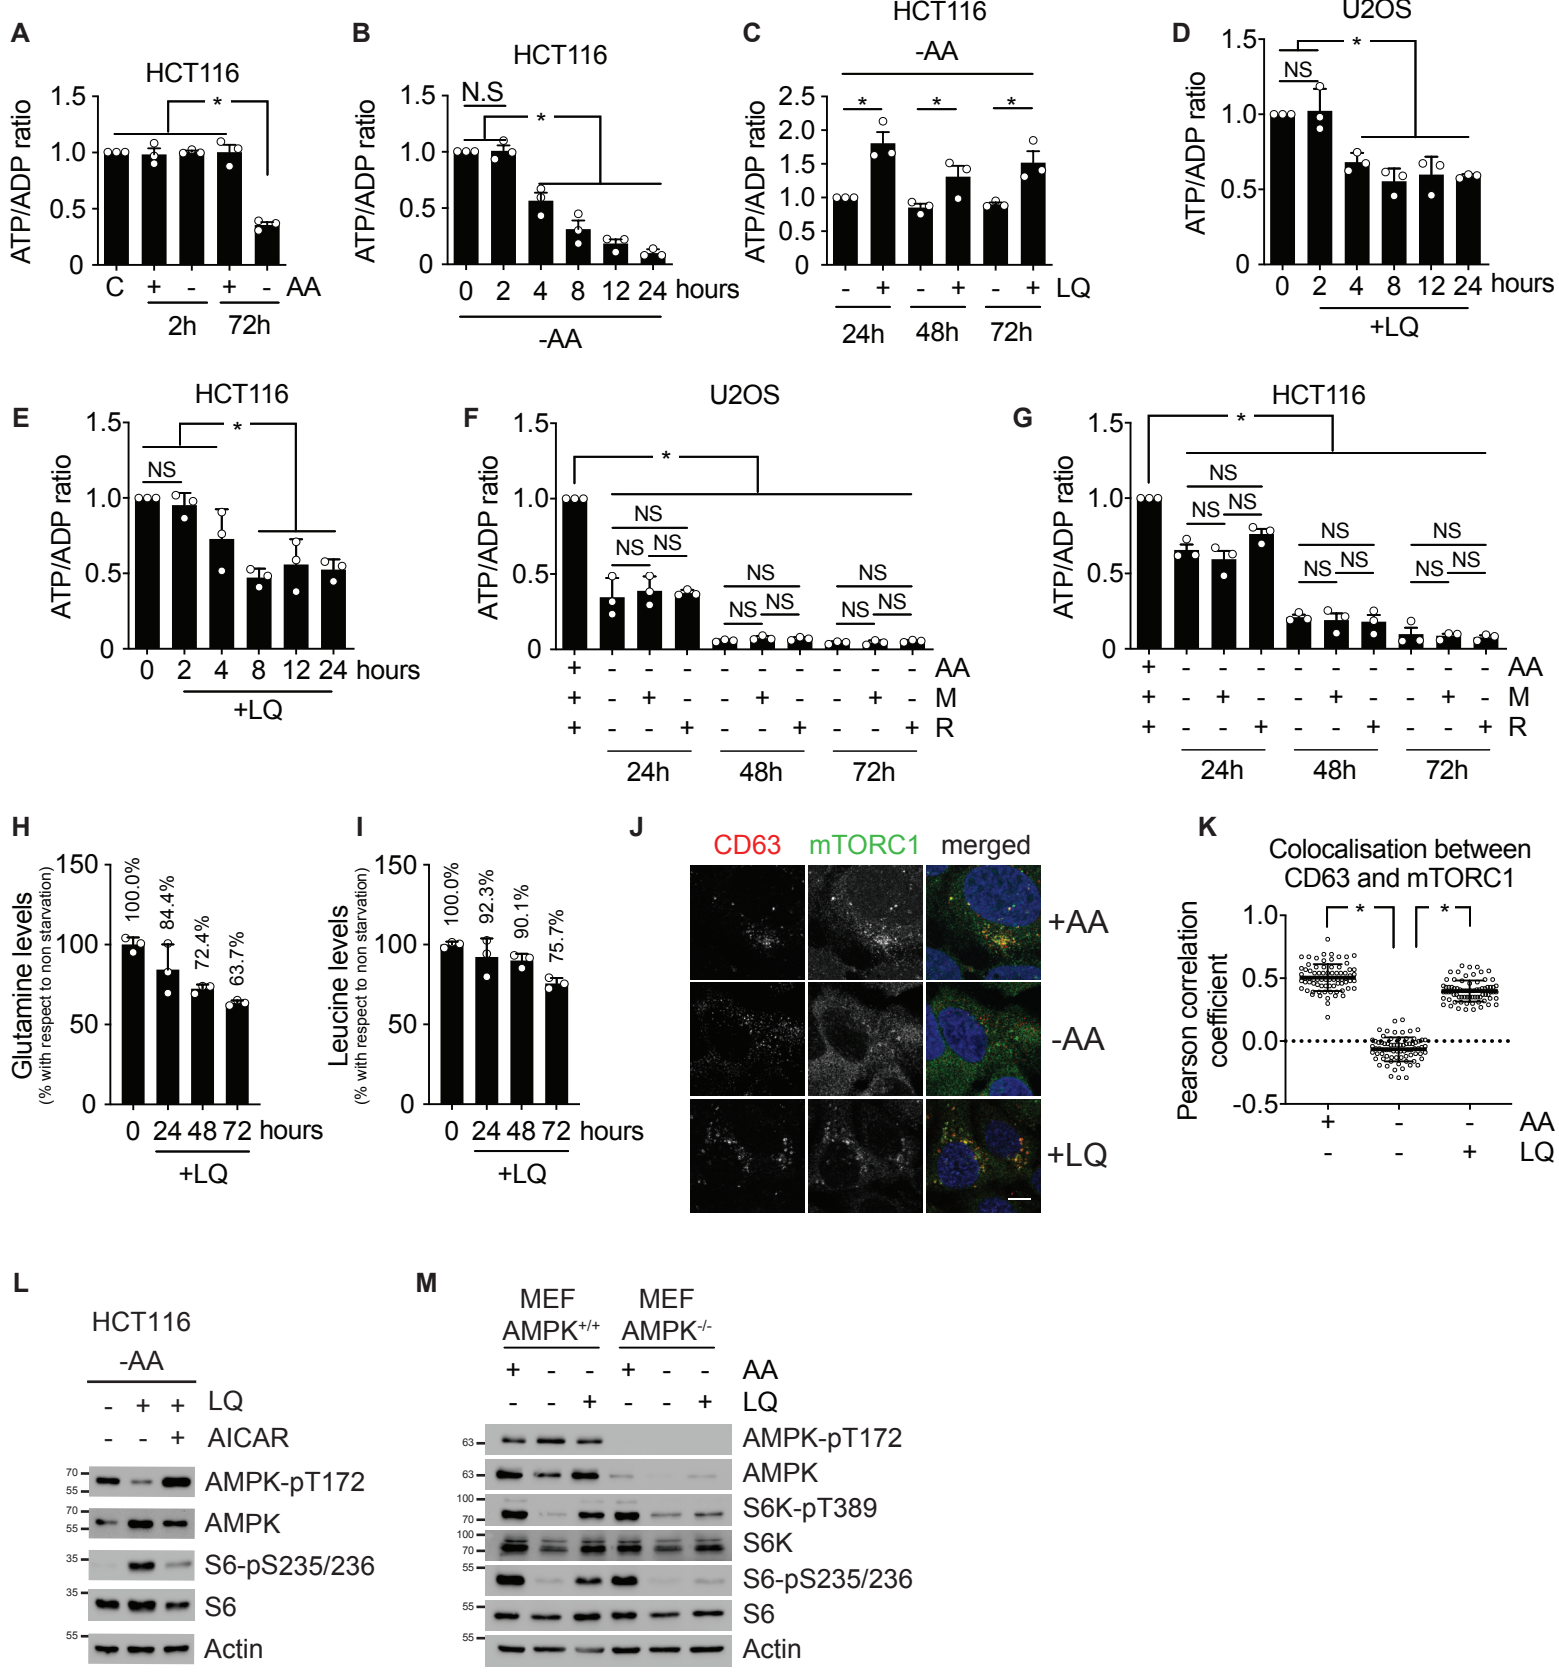

10 **Supplementary Figure 1. Glutaminolysis sustains the production of ATP to inhibit**  
11 **AMPK and to activate mTORC1. (A)** ATP/ADP ratio of HCT116 cells incubated in the  
12 presence or the absence of all amino acids for 2 or 72 hours. Fed cells (C) are used as control.  
13 **(B)** ATP/ADP ratio of HCT116 cells incubated in the presence or the absence of all amino  
14 acids for the indicated time. **(C-E)** ATP/ADP ratio of amino acid-starved HCT116 (C and E)  
15 or U2OS (D) cells incubated in the presence or absence of LQ for the indicated times. **(F and**  
16 **G)** ATP/ADP ratio of amino acid-starved U2OS (F) or HCT116 (G) cells incubated in the  
17 presence or absence of methionine or arginine for the indicated times. **(H and I)** Remaining  
18 levels of glutamine (H) or leucine (I) in the culture medium of U2OS cells incubated for the  
19 indicated time with LQ, as estimated by LC-MS analysis. **(J)** Immunofluorescence microscopy  
20 captions of U2OS cells incubated with or without amino acids, in the presence or absence of  
21 LQ during 72 hours. Cells were stained against CD63 (lysosomal and late endosomal marker,  
22 red), mTORC1 (green) and DAPI (blue). Scale bar represents 10 $\mu$ m. **(K)** Quantification of the  
23 colocalization between CD63 and mTORC1 as shown in G. Person's R value was evaluated  
24 using ImageJ coloc2 plugin on 25 ROI in three biologically independent experiments (75 ROI  
25 in total per condition). **(L)** Immunoblot of mTORC1 activity marker (S6 phosphorylation) and  
26 AMPK phosphorylation of amino acid-starved HCT116 cells incubated in the presence or  
27 absence of LQ, with or without AICAR, during 72 hours. **(M)** Immunoblot of AMPK  
28 phosphorylation and mTORC1 activity markers (S6K and S6 phosphorylation) in AMPK<sup>+/+</sup>  
29 or AMPK<sup>-/-</sup> MEFs incubated in the presence or absence of amino acids or LQ for 72 hours as  
30 indicated.

31 Graphs show mean values  $\pm$  SEM (n=3 biologically independent experiments). \*,  $p < 0.05$   
32 (ANOVA analysis followed by a post hoc Bonferroni test). Source data are provided as a  
33 Source Data file.

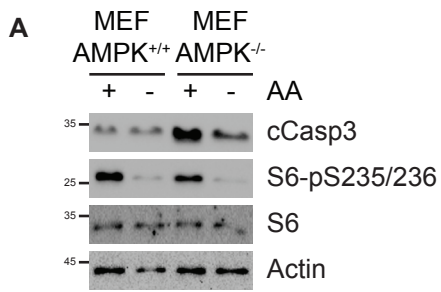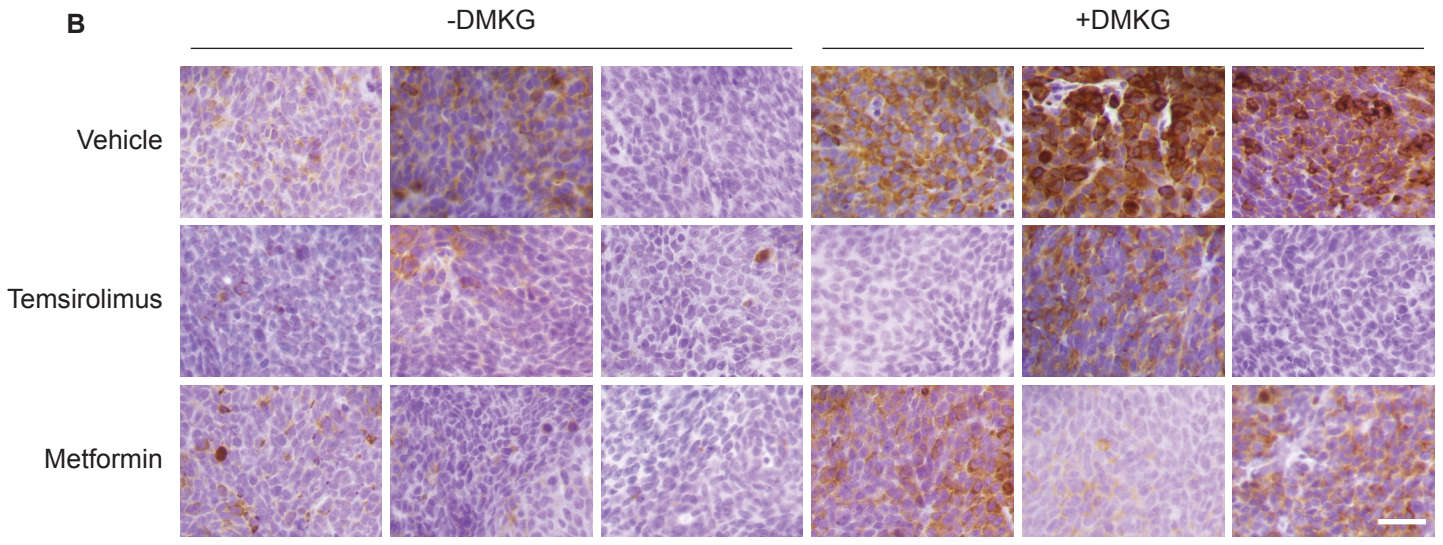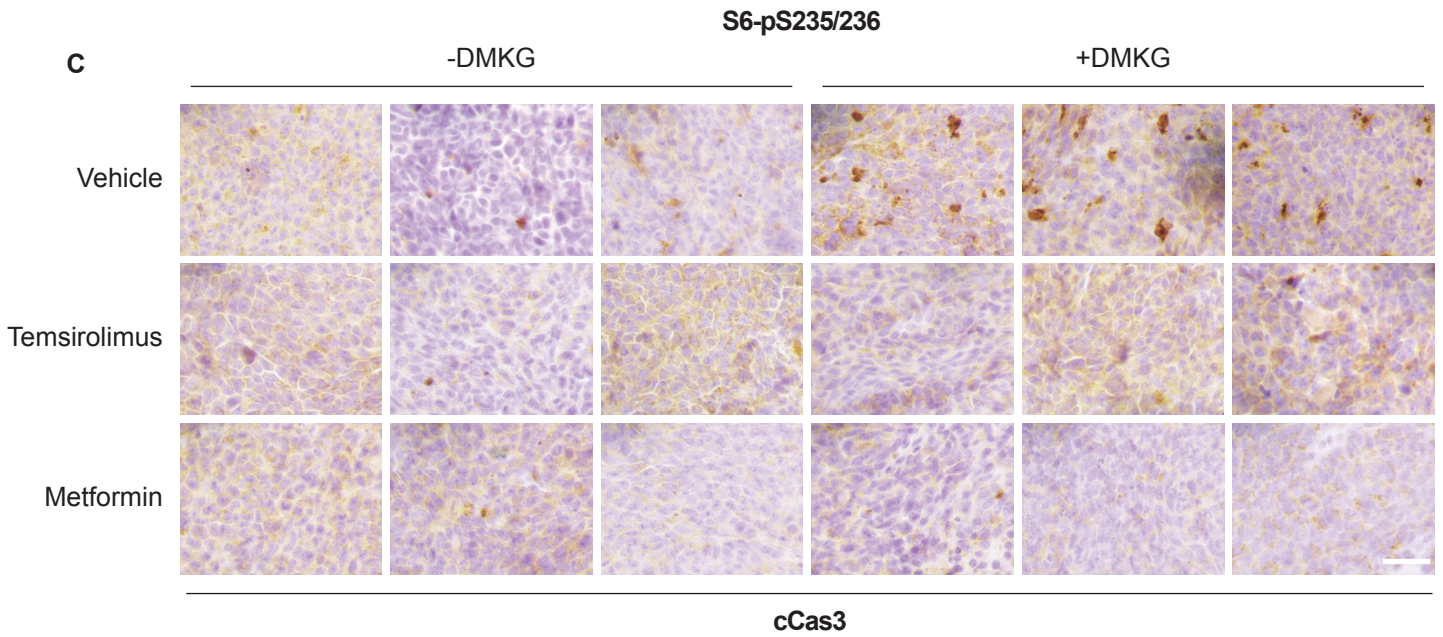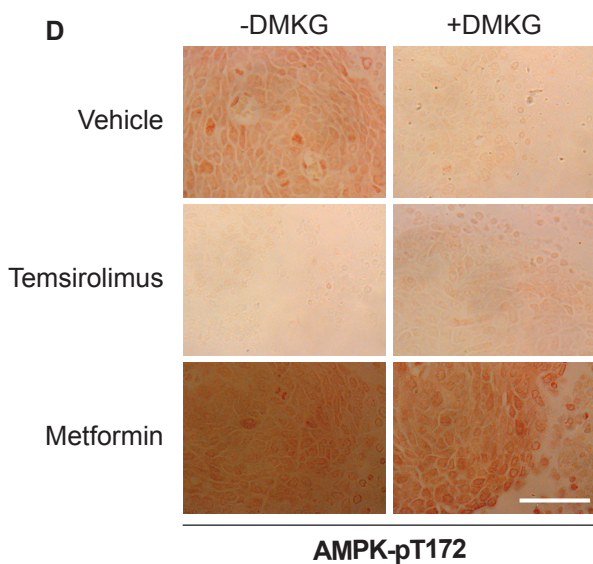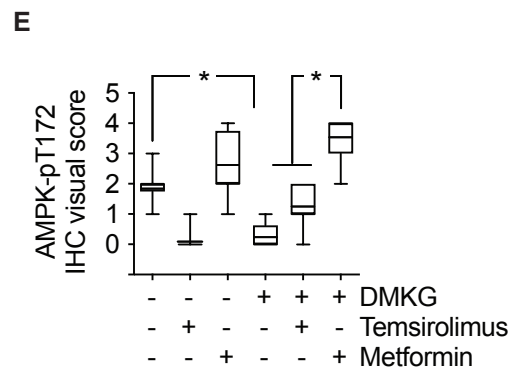

34 **Supplementary Figure 2. AMPK inhibition is necessary for glutamoptosis both *in vitro***  
35 **and *in vivo*.** (A) Immunoblot of mTORC1 activity marker (S6 phosphorylation) and apoptotic  
36 marker (cleaved caspase 3) in AMPK<sup>+/+</sup> or AMPK<sup>-/-</sup> MEFs incubated in the presence or  
37 absence of amino acids for 72 hours. (B and C) Three representative immunohistochemistry  
38 microscopy pictures (40X magnification) of xenograft tumors of mice treated as indicated.  
39 HCT116 were used to generate xenograft tumors in mice. Samples were stained against  
40 S6pS235/236 (B) and cleaved caspase 3 (C). (D) Representative immunohistochemistry  
41 microscopy pictures (40X magnification) of xenograft tumors of mice treated as indicated.  
42 HCT116 were used to generate xenograft tumors in mice. Samples were stained against  
43 pAMPK-T172. (E) Visual score of pAMPK-T172 immunohistochemistry (IHC) images. The  
44 upper and lower limits of the boxes represent quartiles, with the line within the boxes indicating  
45 the median and the whiskers showing the extremes (n≥10 images per treatment). \*,  $p < 0.05$   
46 (ANOVA analysis followed by a post hoc Bonferroni test). Source data are provided as a  
47 Source Data file.



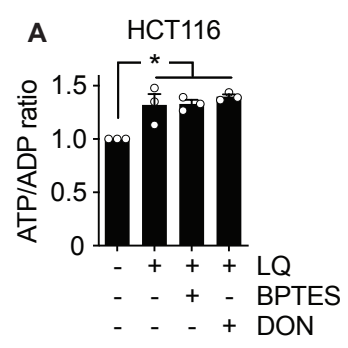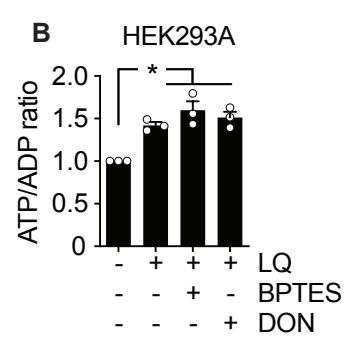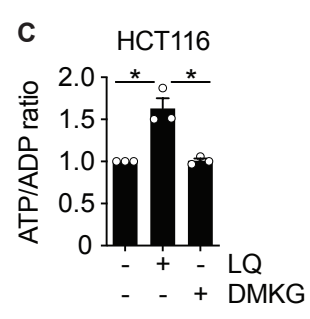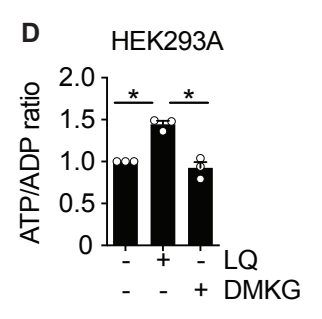

48 **Supplementary Figure 3. Glutaminolysis is not necessary to induce ATP production. (A**  
49 **and B) ATP/ADP ratio of amino acid-starved HCT116 (A) and HEK293A (B) cells incubated**  
50 **with LQ, BPTES and/or DON for 72 hours. (C and D) ATP/ADP ratio of amino acid-starved**  
51 **HCT116 (C) or HEK293A (D) cells with LQ and/or DMKG for 72 hours. Graphs show mean**  
52 **values  $\pm$  SEM (n=3 biologically independent experiments). \*,  $p < 0.05$  (ANOVA analysis**  
53 **followed by a post hoc Bonferroni test). Source data are provided as a Source Data file.**

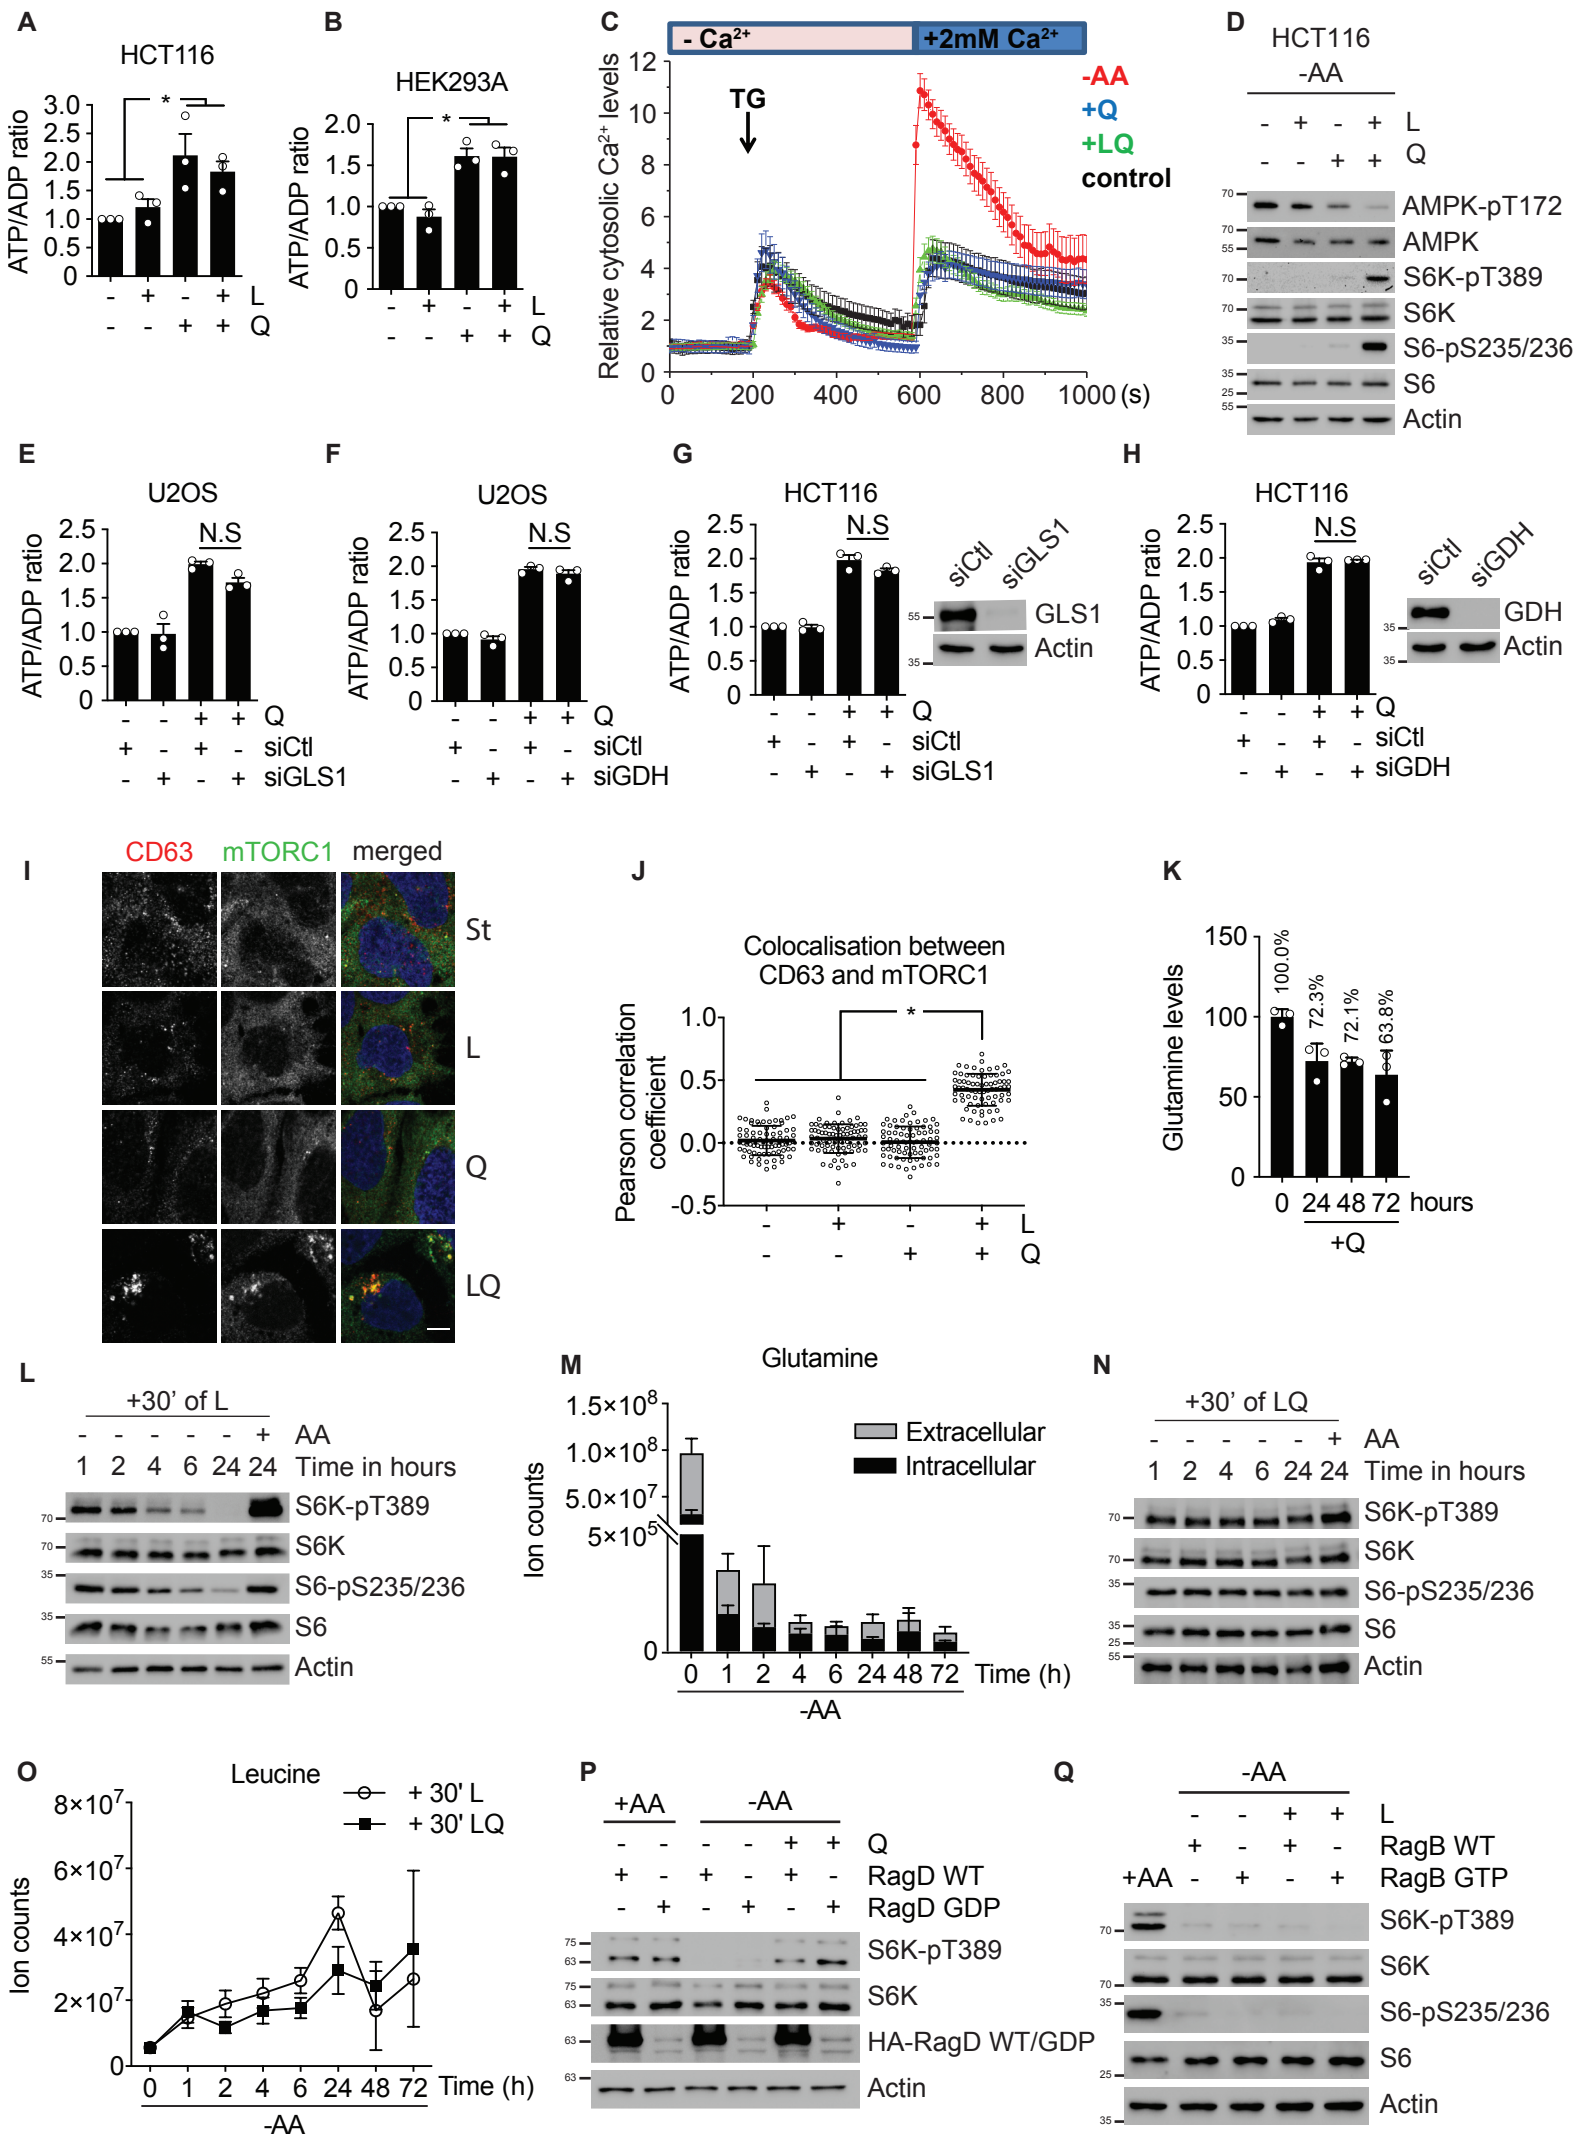

54 **Supplementary Figure 4. Glutamine metabolism activates mTORC1 following two**  
55 **parallel, necessary branches. (A and B)** ATP/ADP ratio of amino acid-starved HCT116 (A)  
56 and HEK293A (B) cells incubated with glutamine and/or leucine. **(C)** U2OS cells were  
57 untreated (control) or treated for 48 hours in amino acid starvation with or without Q or LQ  
58 and were loaded with the calcium probe Fluo2-LR-AM. Fluorescence intensity changes were  
59 normalized to the initial fluorescence value  $F_0$  and expressed as  $F/F_0$  (relative cytosolic calcium  
60 levels). After 200 seconds, thapsigargin ( $1\ \mu\text{M}$ ) was added to the cells bathed in a Calcium-free  
61 medium, in order to estimate ER calcium content. After 600 seconds, calcium was added to the  
62 cells to a final concentration of  $2\text{mM}$ , in order to estimate capacitive calcium influx. Data  
63 represent the mean $\pm$ SD of  $F/F_0$ . **(D)** Immunoblot of mTORC1 activity markers (S6K and S6  
64 phosphorylation) and AMPK phosphorylation in amino acid-starved HCT116 cells incubated  
65 with glutamine and/or leucine for 72 hours. **(E and F)** GLS (E) or GDH (F) expressions were  
66 knocked down using small interfering RNA (siRNA) in U2OS cells for 48 hours. Cells were  
67 then treated with glutamine for 72 hours and the ATP/ADP ratio was measured. Scramble  
68 nontargeting siRNA was used as a control. **(G and H)** GLS (G) or GDH (H) expressions were  
69 knocked down using small interfering RNA (siRNA) in HCT116 cells for 48 hours. Cells were  
70 then treated with glutamine for 72 hours and the ATP/ADP ratio was measured. Scramble  
71 nontargeting siRNA was used as a control. Immunoblots of GLS or GDH levels are presented  
72 as a control of the knockdown. **(I)** Immunofluorescence microscopy captions of U2OS cells  
73 incubated with leucine and/or glutamine during 72 hours. Cells were stained against CD63  
74 (lysosomal and late endosomal marker, red), mTORC1 (green) and DAPI (blue). Scale bar  
75 represents  $10\ \mu\text{m}$ . **(J)** Quantification of the colocalization between CD63 and mTORC1 as  
76 shown in K. Person's R value was evaluated using ImageJ coloc2 plugin on 25 ROI in three  
77 biologically independent experiments (75 ROI in total per condition). **(K)** Remaining levels of  
78 glutamine in the culture medium of U2OS cells incubated for the indicated time with  
79 glutamine, as estimated by LC-MS analysis. **(L)** Immunoblot of mTORC1 markers (S6K and  
80 S6 phosphorylation) in U2OS cells starved for amino acid for 1, 2, 4, 6 and 24h and  
81 restimulated with leucine during 30 minutes. **(M)** Extracellular and intracellular levels of  
82 glutamine as determined by LC-MS analysis in U2OS cells upon all amino acid withdrawal  
83 for the indicated time. **(N)** Immunoblot of mTORC1 markers (S6K and S6 phosphorylation) in  
84 U2OS cells starved for amino acid for 1, 2, 4, 6 and 24h and re-stimulated with leucine and  
85 glutamine during 30 minutes. **(O)** Intracellular leucine levels as determined by LC/MS analysis  
86 in U2OS cells starved for all amino acids for the indicated time followed by a re-stimulation  
87 with either leucine alone or leucine and glutamine during 30 minutes. **(P)** Immunoblot of

88 mTORC1 marker (S6K phosphorylation) of U2OS cells expressing RagD WT or RagD GDP  
89 mutant incubated in the presence or absence of amino acids or glutamine as indicated for 72  
90 hours. **(Q)** Immunoblot of mTORC1 markers (S6K and S6 phosphorylation) of U2OS cells  
91 expressing RagB WT or RagB GTP mutant incubated in the presence or absence of amino  
92 acids or leucine as indicated for 72 hours. Graphs show mean values  $\pm$  SEM (n=3 biologically  
93 independent experiments). \*,  $p < 0.05$  (ANOVA analysis followed by a post hoc Bonferroni  
94 test). Source data are provided as a Source Data file.

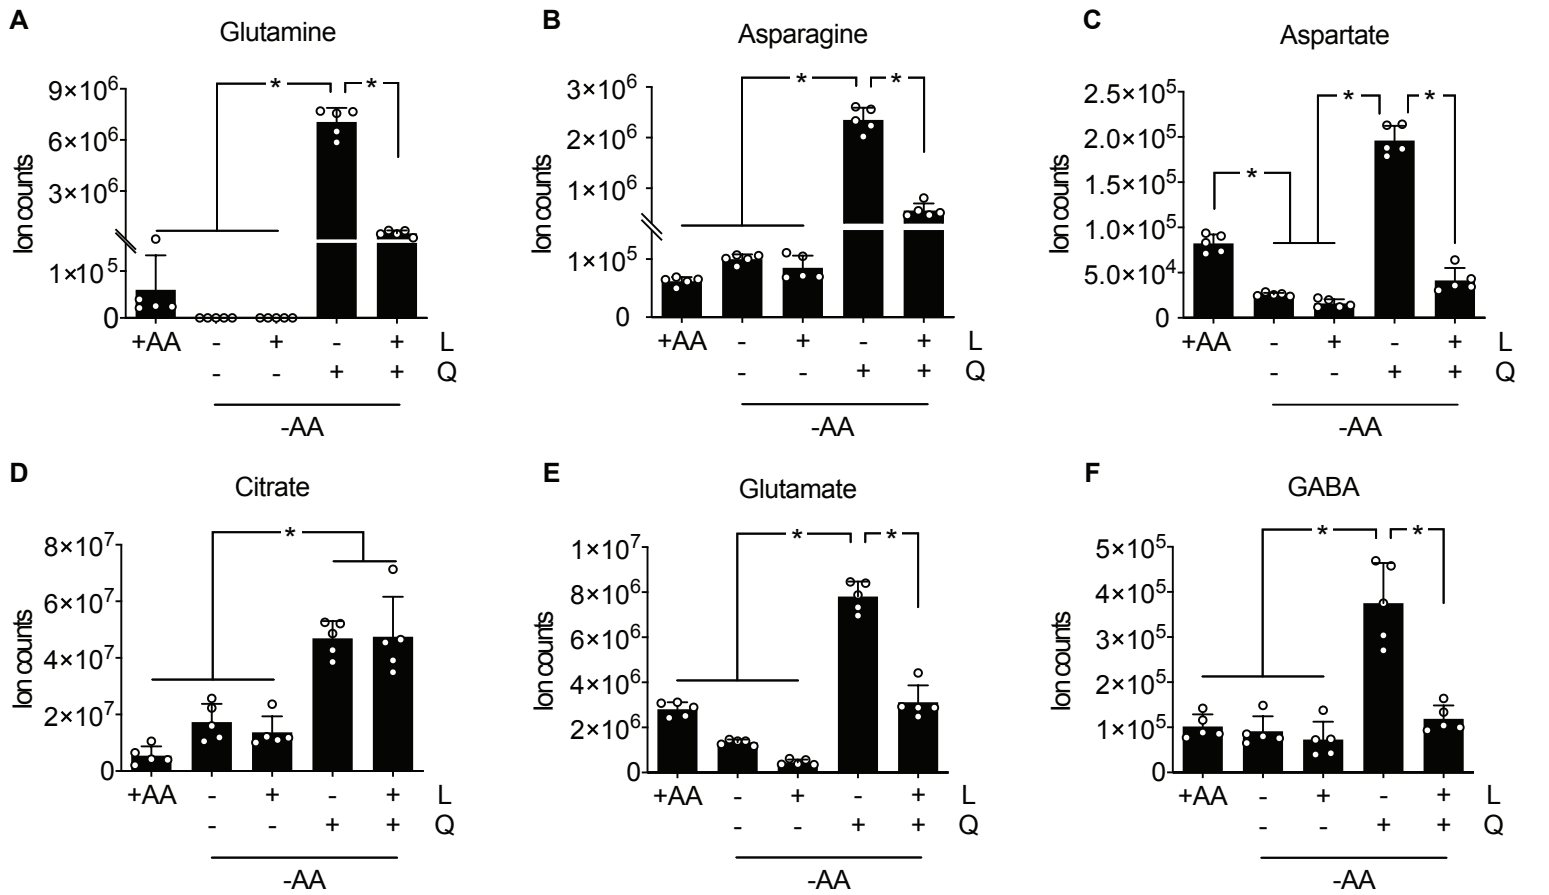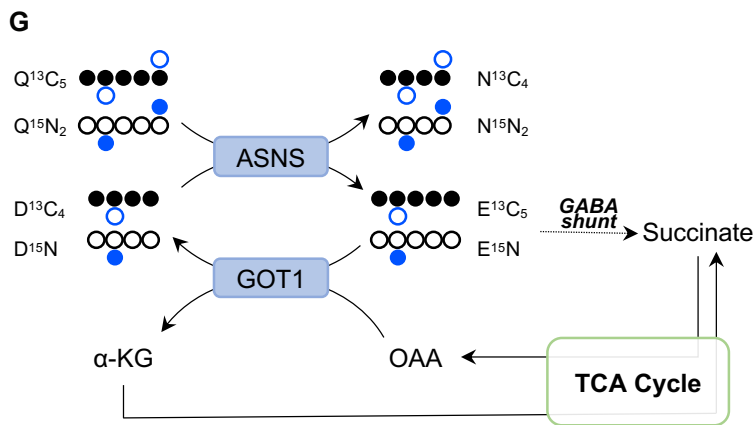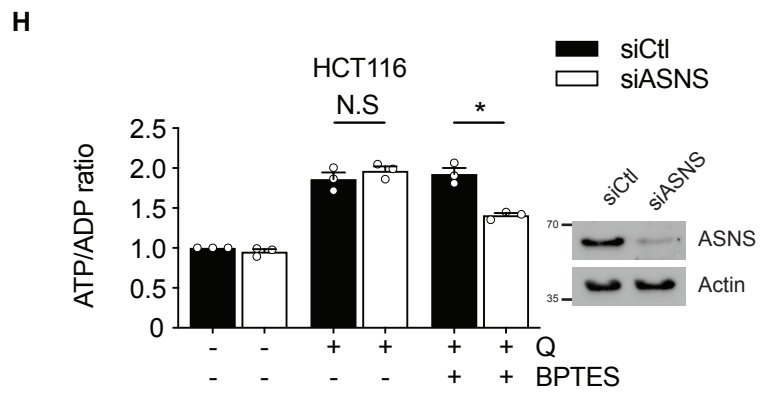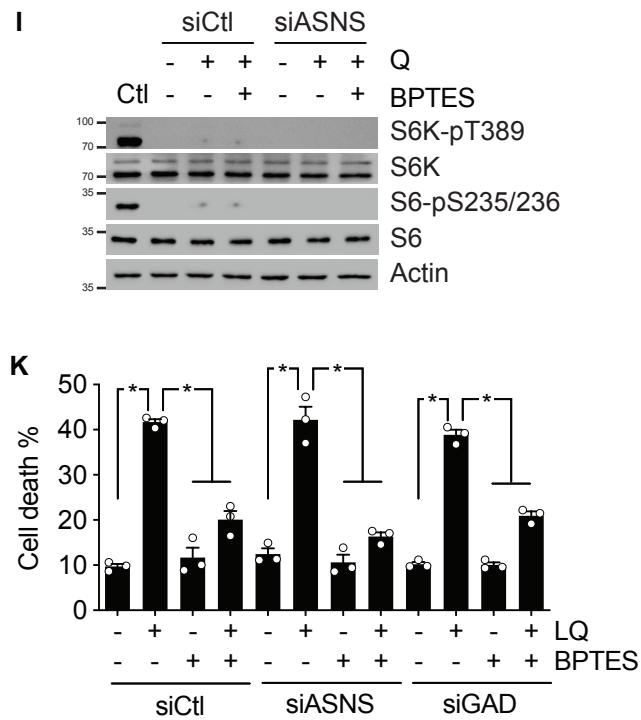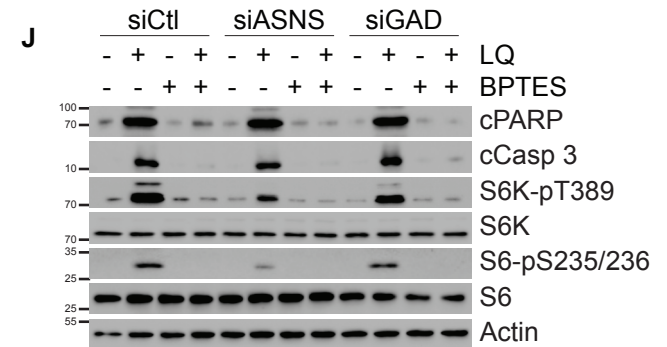

95 **Supplementary Figure 5. ASNS and GABA shunt are alternative pathways to metabolize**  
96 **glutamine. (A-F)** Metabolite levels, as determined by LC-MS analysis, in U2OS cells  
97 incubated with or without all amino acids, glutamine and/or leucine as indicated during 72  
98 hours. Total pools of glutamine (A), asparagine (B), aspartate(C), citrate (D), glutamate (E),  
99 and GABA (F) are graphed, normalized to protein content. **(G)** Graphical representation  
100 describing the metabolism of glutamine by ASNS and the recycling of glutamate through the  
101 TCA cycle and GOT1 to produce aspartate. **(H)** ATP/ADP ratio of amino acid-starved HCT116  
102 cells incubated with glutamine and/or BPTES. Immunoblot of ASNS levels is presented as a  
103 control of the knockdown. **(I)** Immunoblot of mTORC1 markers (S6K and S6 phosphorylation)  
104 of starved U2OS cells upon the silencing of ASNS and in the presence or absence of BPTES  
105 and/or glutamine. ASNS expression was knocked down using small interfering RNA (siRNA)  
106 during 48 hours. Cells were then treated with glutamine and BPTES as indicated for 72 hours.  
107 **(J)** Immunoblot of mTORC1 markers (S6K and S6 phosphorylation) and apoptotic markers  
108 (cleaved PARP and cleaved caspase 3) of starved U2OS cells upon the silencing of ASNS or  
109 GAD and in the presence or absence of BPTES and/or LQ. ASNS or GAD were knocked down  
110 using siRNA for 48 hours and treated with LQ and/or BPTES for 72 hours. **(K)** Cell viability  
111 of U2OS cells treated as (J) as determined by trypan blue assay. Graphs show mean values  $\pm$   
112 SEM (n=3 biologically independent experiments). \*,  $p < 0.05$  (ANOVA analysis followed by  
113 a post hoc Bonferroni test). Source data are provided as a Source Data file.
